# Supplementary material for: Validated LC-MS/MS Assay for the Quantitative Determination of Fenretinide in Plasma and Tumor and Its Application in a Pharmacokinetic Study in Mice of a Novel Oral Nanoformulation of Fenretinide
Source: MDPI journal article supplement (doi:10.3390/pharmaceutics16030387), 2024-03-12
Supplement: s1 [file s1]

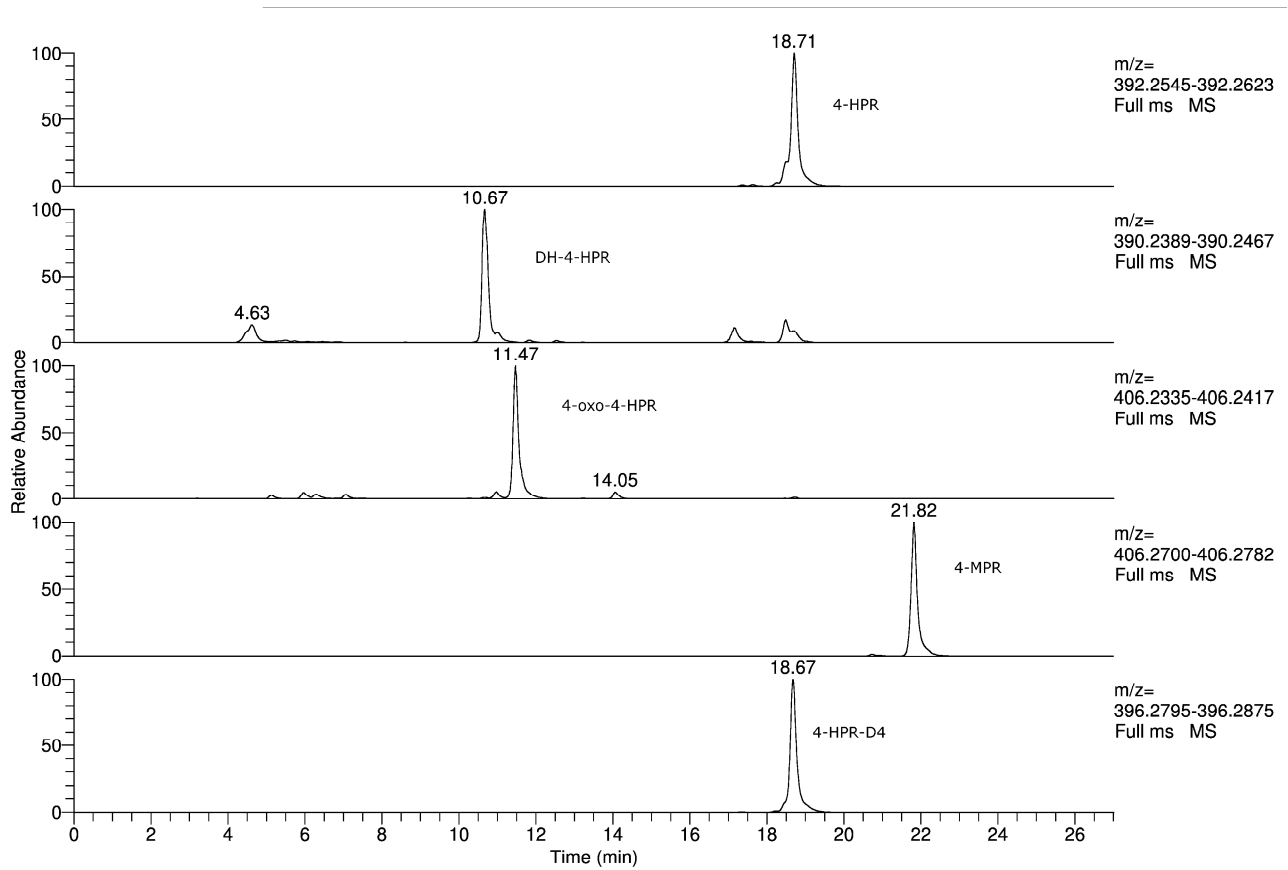

**Supplementary Figure S1.** High resolution ion chromatogram obtained for the m/z value ( $\pm 10$  ppm) of 4-HPR and its main metabolites in a tumor sample.

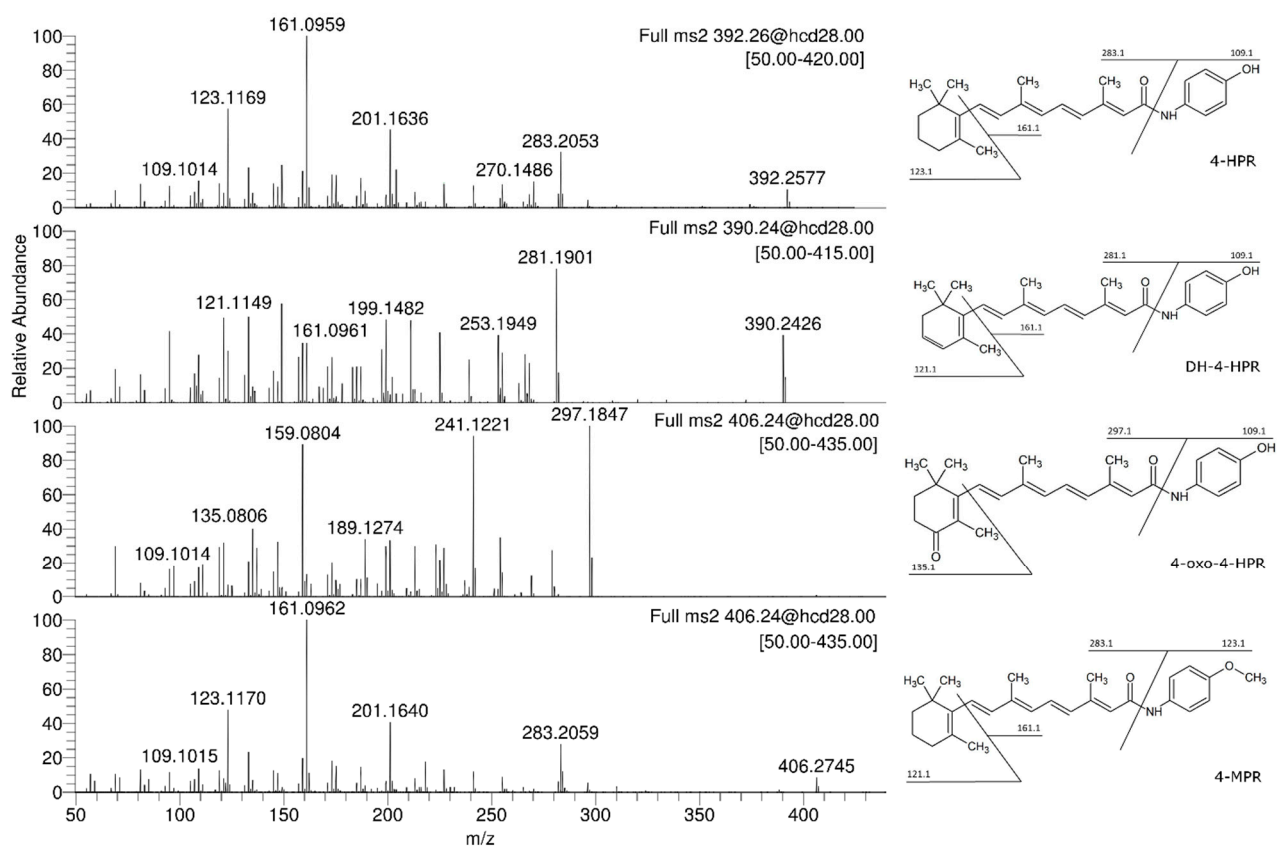

**Supplementary Figure S2.** MS/MS spectra of 4-HPR and its identified metabolites, highlighting some of the observed ion fragments.

**Supplementary Table S1:** Comparison of the characteristics of the current method with others present in the literature

|                                          | Matrices analyzed       | Analytes analyzed                         | Common features                                                                                                                                                                   | Differences                                                                                                                                                                                                                                                                                                                                                       | LOQ in plasma | Improvements                                                                                                                                                                                                                                                                                                     |
|------------------------------------------|-------------------------|-------------------------------------------|-----------------------------------------------------------------------------------------------------------------------------------------------------------------------------------|-------------------------------------------------------------------------------------------------------------------------------------------------------------------------------------------------------------------------------------------------------------------------------------------------------------------------------------------------------------------|---------------|------------------------------------------------------------------------------------------------------------------------------------------------------------------------------------------------------------------------------------------------------------------------------------------------------------------|
| <b>F. Formelli et al., 1993</b><br>[12]  | Plasma<br>Breast tissue | 4-HPR<br>4-MPR                            | <ul style="list-style-type: none"> <li>- Handling procedures.</li> <li>- Chromatographic characteristics: reverse column, gradient features and run time below 10 min.</li> </ul> | <ul style="list-style-type: none"> <li>- Extractive solvent: CH<sub>3</sub>CN</li> <li>- HPLC-UV (<math>\lambda</math>= 340)</li> <li>- 3 points calibration plasma range: 5-2500 ng/mL.</li> </ul>                                                                                                                                                               | 5 ng/ml       | <ul style="list-style-type: none"> <li>- Wider range of linearity applied reduces the need for dilutions.</li> <li>- The simultaneous measurement of the analyte and the metabolites allowed a more thorough analysis of the pharmacokinetic characteristics and limited the amount of matrix needed.</li> </ul> |
| <b>J. Vratilova et al., 2004</b><br>[13] | Tumour                  | 4-HPR<br>4-MPR                            |                                                                                                                                                                                   | <ul style="list-style-type: none"> <li>- Extractive solvent: CH<sub>3</sub>CN</li> <li>- HPLC-UV (<math>\lambda</math>= 340).</li> <li>- 6 points calibration tumor range: 0.5-20 µg/mL.</li> </ul>                                                                                                                                                               | 0.5 µg/mL.    |                                                                                                                                                                                                                                                                                                                  |
| <b>J. I. Lee et al., 2008</b><br>[10]    | Plasma                  | 4-HPR<br>4-MPR                            |                                                                                                                                                                                   | <ul style="list-style-type: none"> <li>- Extractive solvent: CH<sub>3</sub>CN</li> <li>- HPLC-APCI-MS/MS. MRM +</li> <li>- 8 points calibration plasma range: 0.5-100 ng/mL.</li> <li>- Target ions m/z 392.4/283.3 for 4-HPR and m/z 406.3/283.2 for 4-MPR.</li> </ul>                                                                                           | 0.5 ng/ml     |                                                                                                                                                                                                                                                                                                                  |
| <b>H.E. Cho et al., 2017</b><br>[14]     | Plasma                  | 4-HPR<br>4-MPR<br>4-oxo-4-HPR             |                                                                                                                                                                                   | <ul style="list-style-type: none"> <li>- Extractive solvent: CH<sub>3</sub>CH<sub>2</sub>OH</li> <li>- HPLC-ESI-QTRAP. MRM +</li> <li>- 8 points calibration plasma range: 0.2-50.0 ng/mL.</li> <li>- Target ions m/z 392.3/283.3 for 4-HPR, m/z 406.3/283.2 for 4-MPR and 406.3/297.2 for 4-oxo-4-HPR.</li> </ul>                                                | 0.2 ng/ml     |                                                                                                                                                                                                                                                                                                                  |
| <b>Present method</b>                    | Plasma<br>Tumour        | 4-HPR<br>4-MPR<br>4-oxo-4-HPR<br>DH-4-HPR |                                                                                                                                                                                   | <ul style="list-style-type: none"> <li>- Extractive solvent: CH<sub>3</sub>CN</li> <li>- HPLC-APCI-MS/MS. MRM +</li> <li>- 8 points calibration plasma range: 1-500 ng/mL.</li> <li>- 6 points calibration tumour range: 0.35-14.0 µg/g.</li> <li>- Target ions m/z 392.4/283.3 for 4-HPR, m/z 406.3/283.2 for 4-MPR and m/z 390.2/281.1 for DH-4-HPR.</li> </ul> | 1.0 ng/ml     |                                                                                                                                                                                                                                                                                                                  |
